# Supplementary material
Source: Springer Nature journal article supplement (https://www.springerprofessional.de/resource/supplementary/13638_2010_16_MOESM6_ESM.pdf/11897190)

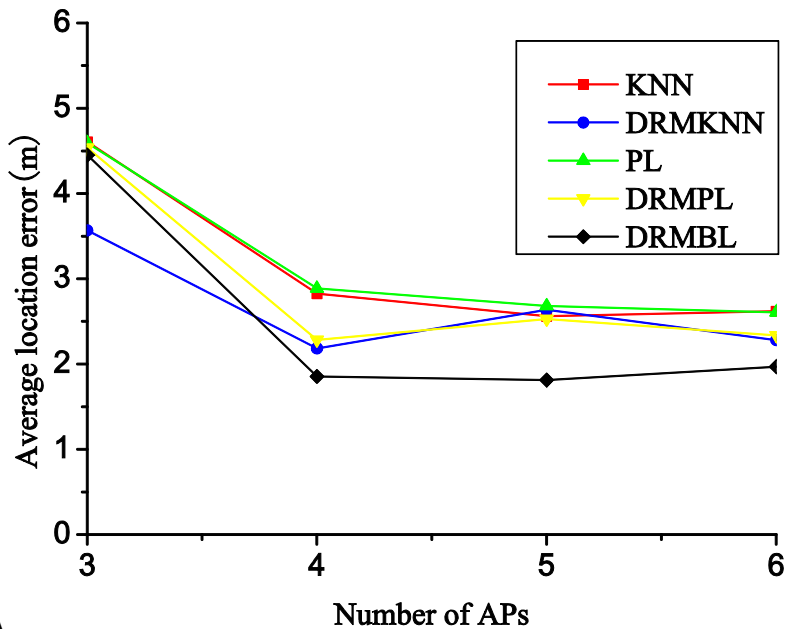

A

Number of APs

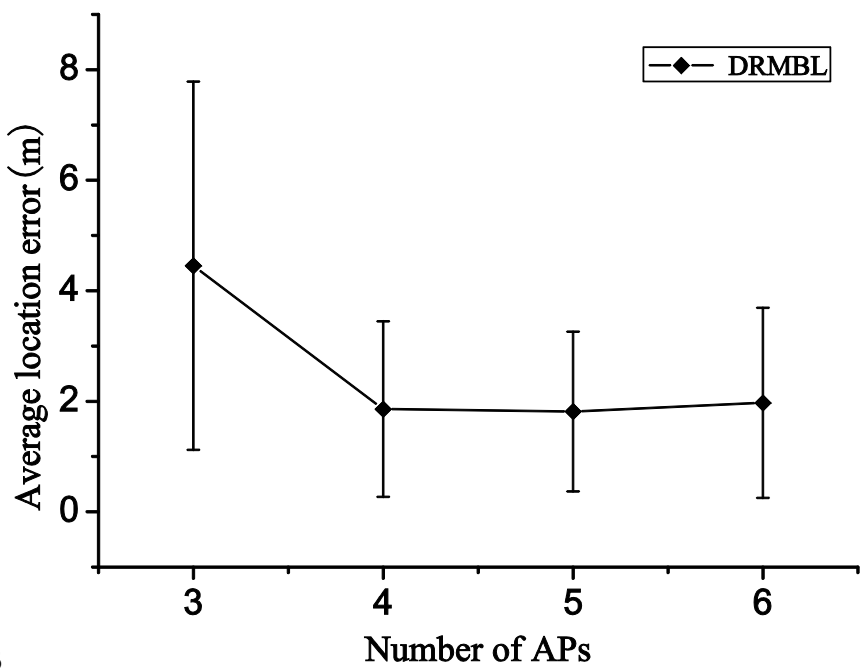

B

Number of APs

Supplement: MOESM6 [file 11897190]
